# 1 The scaling of genome size and cell size limits maximum rates 2 of photosynthesis with implications for ecological strategies

3

4 Adam B. Roddy<sup>1</sup>, Guillaume Thérroux-Rancourt<sup>2</sup>, Tito Abbo<sup>3</sup>, Joseph W. Benedetti<sup>4</sup>, Craig R.  
5 Brodersen<sup>1</sup>, Mariana Castro<sup>5</sup>, Silvia Castro<sup>5</sup>, Austin B. Gilbride<sup>4</sup>, Brook Jensen<sup>6</sup>, Guo-Feng  
6 Jiang<sup>7</sup>, John A. Perkins<sup>8</sup>, Sally D. Perkins<sup>9</sup>, João Loureiro<sup>5</sup>, Zuhah Syed<sup>10</sup>, R. Alexander  
7 Thompson<sup>3</sup>, Sara E. Kuebbing<sup>11</sup>, Kevin A. Simonin<sup>3</sup>

8

9 1 School of Forestry & Environmental Studies, Yale University, New Haven, CT 06511 USA

10 2 Institute of Botany, Universität für Bodenkultur, Vienna, Austria

11 3 Department of Biology, San Francisco State University, San Francisco, CA, 94132 USA

12 4 Amity Regional High School, Woodbridge, CT 06525 USA

13 5 Centre for Functional Ecology, Department of Biology, University of Coimbra, Calçada  
14 Martim de Freitas, 3000-456, Coimbra, Portugal

15 6 Department of Biological Sciences, California State University-Stanislaus, Turlock, CA  
16 95382 USA

17 7 State Key Laboratory of Conservation and Utilization of Subtropical Agrobioresources and  
18 Guangxi Key Laboratory of Forest Ecology and Conservation, College of Forestry, Guangxi  
19 University, Nanning, Guangxi 530004, China

20 8 Azalea Society of America, Washington, D.C., USA

21 9 American Rhododendron Society, Great River, NY 11739 USA

22 10 High School in the Community, New Haven, CT 06511, USA

23 11 Department of Biological Sciences, University of Pittsburgh, Pittsburgh, PA 15260 USA

24

25 Author for contact:

26 Email: [adam.rodny@yale.edu](mailto:adam.rodny@yale.edu)

27 Phone: +1.510.224.4432

28 ORCID: 0000-0002-4423-8729

29

## 30 **Abstract**

31 A central challenge in plant ecology is to define the major axes of plant functional variation  
32 with direct consequences for fitness. Central to the three main components of plant fitness  
33 (growth, survival, and reproduction) is the rate of metabolic conversion of CO<sub>2</sub> into carbon  
34 that can be allocated to various structures and functions. Here we (1) argue that a primary  
35 constraint on the maximum rate of photosynthesis per unit leaf area is the size and packing  
36 density of cells and (2) show that variation in genome size is a strong predictor of cell sizes,  
37 packing densities, and the maximum rate of photosynthesis across terrestrial vascular  
38 plants. Regardless of the genic content associated with variation in genome size, the simple  
39 biophysical constraints of encapsulating the genome define the lower limit of cell size and  
40 the upper limit of cell packing densities, as well as the range of possible cell sizes and  
41 densities. Genome size, therefore, acts as a first-order constraint on carbon gain and is  
42 predicted to define the upper limits of allocation to growth, reproduction, and defense. The  
43 strong effects of genome size on metabolism, therefore, have broad implications for plant  
44 biogeography and for other theories of plant ecology, and suggest that selection on  
45 metabolism may have a role in genome size evolution.

46

47

48

## 49 Introduction

50 Quantifying major axes of plant functional variation has given rise to an ever-growing list of  
51 traits that impact growth, reproduction, and survival, the three components of individual  
52 fitness (Violle et al. 2007). These traits have traditionally been viewed from a reductionist  
53 perspective that scales form-function relationships of individual plant organs (e.g. leaves,  
54 stems, and roots) to whole organism ecological strategies. As the ultimate source of energy  
55 and matter for growth and reproduction, photosynthetic capacity represents a first-order  
56 constraint on the emergent properties between whole plant form and function and  
57 individual fitness. Here we provide evidence that genome-cellular allometry directly  
58 influences interspecific variation in photosynthetic metabolism and provide a mechanistic  
59 framework that links genome size and metabolism to other aspects of plant ecology and  
60 evolution.

61 One of the three components of fitness is growth, which is ultimately limited by  
62 photosynthetic metabolism. Relative growth rate (RGR) varies considerably across species  
63 and is driven by photosynthetic rate and the resource investment to support  
64 photosynthesis as:

$$65 \quad RGR = A_{mass} \cdot LMR$$

66 where  $A_{mass}$  is the photosynthetic rate per unit leaf biomass and LMR is the leaf mass ratio  
67 (the proportion of leaf dry mass to total plant dry mass).  $A_{mass}$  is, therefore, frequently  
68 considered a major plant strategy axis (Poorter and Remkes 1990; Poorter et al. 1990;  
69 Reich et al. 1992). However,  $A_{mass}$  can be decomposed as:

$$70 \quad A_{mass} = SLA \cdot A_{area}$$

71 where SLA is the specific leaf area (leaf area per leaf dry mass) and  $A_{area}$  is the net carbon  
72 assimilation rate per unit canopy leaf area. Because of its direct effect on  $A_{mass}$ , SLA is often  
73 considered a major predictor of interspecific variation in RGR.  $A_{area}$ , on the other hand,

74 varies orthogonally to SLA (Wright et al. 2004), and, therefore, determines the upper limit  
75 of the relationship between  $A_{mass}$ , SLA, and RGR. Maximum potential  $A_{area}$  represents, then,  
76 a fundamental limitation on the maximum amount of carbon available for allocation to  
77 growth, reproduction, and survival relative to species ecological strategies.

78 The centrality of  $A_{area}$  to plant ecological strategy suggests two questions:

- 79 • First, what are the fundamental features of plant structure that determine maximum  
80 potential  $A_{area}$ ?
- 81 • Second, to what extent do these relationships scale up to affect plant ecological  
82 strategies and evolutionary dynamics?

83 Here we present a mechanistic framework to address both of these questions, that is based  
84 on the positive scaling between genome size and cell size. Although the relationship  
85 between genome size (i.e. nuclear volume) and cell size has long been of interest (von  
86 Sachs 1893), the mechanisms are still not fully understood (Doyle and Coate 2019), and its  
87 implications for organismal metabolism have not been fully articulated. We show that the  
88 allometry between genome size and cell size influences rates of photosynthetic metabolism  
89 and argue that the scaling of genome size and metabolism affects ecological distributions  
90 and evolutionary dynamics. In this way, any factor affecting rates of metabolism is a  
91 potential agent of selection on genome size and, potentially, on genome structure as well.

92 It is now widely recognized that variation in genome size can have significant  
93 consequences for organismal structure and function, independent of the genes that define  
94 the genotype (Bennett 1971). Positive scaling between genome size and cell size across  
95 terrestrial plants has given rise to numerous studies characterizing the many other  
96 phenotypic correlates of genome size independent of variation in genome structure,  
97 commonly referred to as “nucleotype” effects, although some of these correlations are  
98 disputable after accounting for shared phylogenetic history (Bennett 1971; Cavalier-Smith  
99 1978; 1982; Bennett and Leitch 2005). Correlates of genome size encompass an incredible  
100 diversity of plant phenotypes, including, for example, the sizes of plant structures, rates of  
101 cell division, rates of physiological processes, and tolerances and responses to abiotic  
102 conditions (Table 1).

103 Our goal is not to recapitulate the many reviews about the nucleotype-phenotype  
104 relationship but, instead, to align these studies more systematically with the field of plant  
105 functional biology. We believe that the diverse impacts of genome-cellular allometry on the  
106 body plan of terrestrial vascular plants strongly influences the coordination between plant  
107 functional traits and, ultimately, whole organism form-function relationships. Here we  
108 summarize previous research, perform new analyses of existing data, and present new data  
109 to show how genome size may, through its impacts on cell size and tissue structure,  
110 determine the biophysical limits of plant metabolic rates, and, therefore, influence other  
111 aspects of ecology and evolution. That genome size may be a key functional trait is not a  
112 new idea (Grime 1998). Yet, despite numerous reports of the phenotypic and ecological  
113 correlates of genome size (Table 1), it has not been fully integrated into the functional trait  
114 literature. Our goal, therefore, is to more directly show how genome size influences plant  
115 traits that impact maximum rates of photosynthetic metabolism. Metabolism is central to  
116 all three aspects of plant fitness, providing the carbon necessary for allocation to growth,  
117 reproduction, and survival. As such, genome size may not itself be a functional trait but  
118 instead may define the limits of variation in numerous other functional traits.

## 119 **Genome-cellular allometry limits rates of resource transport and** 120 **metabolism**

### 121 **Allometry of genome size and cell size**

122 The role of the genome in limiting cell size has been postulated since at least the late 1800s  
123 (von Sachs 1893) and was critical in shaping early modern views of the evolution of plant  
124 vascular systems (Bailey and Tupper 1918). At a minimum, a cell must contain its genome,  
125 and there is a strong relationship between the volumes of meristematic cells and genome  
126 size (Šímová and Herben 2012). Cellular expansion from this meristematic minimum size is  
127 cell type-specific (Doyle and Coate 2019). Within a cell type, size can be influenced by  
128 various environmental and developmental factors (Melaragno et al. 1993). Despite this  
129 substantial growth in cell volume during development, there remains a significant effect of  
130 genome size on cell size, particularly for stomatal guard cells (Beaulieu et al. 2008; Knight

131 and Beaulieu 2008; Lomax et al. 2013; Simonin and Roddy 2018). For example, stomatal  
132 guard cell size and density, which regulate the fluxes of water and CO<sub>2</sub> between the  
133 biosphere and atmosphere, vary within species depending on light, water availability, and  
134 atmospheric CO<sub>2</sub> concentration (Hetherington and Woodward 2003; Franks and Beerling  
135 2009). Furthermore, in the vascular transport network, the sizes of xylem conduits and  
136 their density in the leaf are also affected by variation in genome size (Maherali et al. 2009;  
137 Hao et al. 2013; De Baerdemaeker et al. 2018; Simonin and Roddy 2018). Yet why genome  
138 size and final cell size are correlated within a cell type remains unclear (Doyle and Coate  
139 2019).

140 We tested whether smaller genomes allow not only for smaller initial and final cell sizes  
141 but also for a greater range in final cell size using published data for terrestrial C3 plants.  
142 We used data for stomatal guard cells because they are the most commonly measured cell  
143 sizes in plants and because their sizes and abundance determine the leaf surface  
144 conductance to CO<sub>2</sub> and water vapor and, therefore, directly control rates of resource  
145 transport for use in photosynthetic metabolism. Sizes of guard cells for angiosperms  
146 (Beaulieu et al. 2008), gymnosperms, and ferns were compiled previously by Simonin and  
147 Roddy (2018), and here we include data for mosses and hornworts from Field et al. (2015)  
148 and Renzaglia et al. (2017). We assumed that stomatal guard cells are shaped as capsules,  
149 which are composed of a central cylinder with hemispherical ends, such that cell volume  
150 could be estimated from cell length as:

151 
$$V = \pi \cdot r^2 \cdot \left(\frac{4}{3}r + a\right)$$

152 where  $r$  is the radius of the cylinder and of the hemispherical ends and  $a$  is the height of the  
153 cylinder. We assumed that  $a$  is equal to  $2r$ , such that the guard cell length is equal to  $4r$ .  
154 Simplifying this equation allowed cell volume to be calculated from guard cell length as:

155 
$$V = \frac{5}{96} \pi \cdot (\text{guard cell length})^3.$$

156 The dumbbell-shaped guard cells present among monocots would likely violate these  
157 assumptions about cell shape and so we excluded from this analysis data for the Poaceae,

158 which are known to have dumbbell-shaped guard cells. Data for meristematic cell volume  
159 and genome size were taken from Šímová and Herben (2012). We used linear regression (R  
160 package *stats*) to fit the mean response and quantile regression (R package *rq*) to test  
161 whether there was greater variation in cell volume among taxa with smaller genomes (i.e.  
162 heteroskedasticity), based on differences between quantile regression slopes, using the  
163 functions 'rq' and 'anova.rq'.

164 Across over two orders of magnitude in genome size, meristematic cell volume defined the  
165 lower limit of guard cell volume (Figure 1); the smallest guard cells were only slightly  
166 larger than meristematic cells of the same genome size. Genome size was a strong and  
167 significant predictor of meristematic cell volume ( $\log(\text{volume}) = 0.69 \log(\text{genome size}) +$   
168  $2.68$ ;  $R^2 = 0.98$ ,  $P < 0.001$ ; Šímová and Herben 2012). Though it explained less of the  
169 variation, genome size was a significant predictor of final guard cell volume among  
170 terrestrial vascular plants ( $\log(\text{cell volume}) = 0.55 \log(\text{genome size}) + 3.44$ ;  $R^2 = 0.48$ ,  $P <$   
171  $0.001$ ). Including mosses and hornworts, however, substantially reduced the explanatory  
172 power of genome size on cell volume to under 10%. Quantile regression revealed that for  
173 vascular plants the slope through the 10th quantile was steeper (slope =  $0.66 \pm 0.07$ ,  
174 intercept =  $2.98 \pm 0.07$ ) than the slope through the 90th quantile ( $0.47 \pm 0.09$ ), although  
175 this difference was not significant ( $P = 0.07$ ). While there was no significant difference  
176 between the 10% and 90% quantile slopes, lower quantiles had consistently steeper slopes  
177 when considering all species and also angiosperms alone (Figure S1), suggesting that the  
178 smaller minimum cell size allowed by smaller genomes enables greater variation in final  
179 cell size. In fact, for a given genome size, interspecific variation in mature guard cell volume  
180 could vary by as much as two orders of magnitude among vascular plants. Theoretically,  
181 maximum cell size is not as tightly constrained by genome size, such that other cell types  
182 can be much larger than guard cells. The greater variation among species with smaller  
183 genomes implies that smaller genomes allow for greater plasticity in cell sizes and cell  
184 packing densities which directly influence maximum rates of leaf surface conductance to  
185  $\text{CO}_2$  and water and ultimately photosynthetic metabolism per unit leaf surface area  
186 (Simonin and Roddy 2018). Further, the greater diversity of cell sizes observed in plants  
187 with small genomes suggests that the correlation between genome size and cell size is

188 simply the result of occupying available space within the cell. A small genome can be  
189 housed in either a small or a large cell, but a large genome cannot be housed in a cell  
190 smaller than its nucleus.

191 The greater variation in cell volume allowed by smaller genomes (Figure 1) further  
192 suggests that smaller genomes allow for greater variation in cell packing densities. For  
193 guard cell lengths, stomatal densities, and vein densities, smaller genomes allowed for  
194 greater variation in traits across ferns, gymnosperms and angiosperms (Simonin and  
195 Roddy 2018). Species with smaller genomes in these datasets are predominantly  
196 angiosperms, and these analyses compared distantly related species. We further tested for  
197 greater variation in cell sizes and packing densities with smaller genomes among closely  
198 related species using taxa in *Rhododendron* (Ericaceae) sect. *Schistanthe* Schltr. (= sect.  
199 *Vireya* Blume) and a collection of deciduous *Rhododendron* cultivars that vary in ploidy  
200 from diploids to hexaploids. The monophyletic *Schistanthe* clade has a stepwise  
201 phylogeographic history, having radiated eastward from the Malay Peninsula and reached  
202 New Guinea within the last 15 Ma (Goetsch et al. 2011). We sampled leaves from 19 taxa  
203 growing under common garden conditions at the Rhododendron Species Foundation  
204 Botanical Garden in Federal Way, WA, USA. Genome sizes were measured following  
205 standard protocols (Dolezel et al. 2007) at the Benaroya Research Institute in Seattle, WA,  
206 USA. For measurements of stomatal size and density, epidermal impressions were made on  
207 fresh leaves using dental putty (Coltene Whaledent President Light Body), transferred  
208 using clear nail polish, mounted in water, and imaged using a light microscope.  
209 Measurements of leaf vein density were made on leaf sections cleared by soaking in 4%  
210 NaOH, 3% sodium hypochlorite, stained with 1% Safranin O, counterstained with 1% Fast  
211 Green, mounted in ethanol, and imaged with a light microscope. Stomatal traits were  
212 averaged across ten images per taxon, and leaf vein density was averaged across five  
213 images per taxon. Genome sizes for the *Rhododendron* cultivars were measured at the  
214 University of Coimbra, Portugal, and all anatomical measurements were made on leaf  
215 sections cleared in 4% NaOH, stained in 1% Safranin and mounted in ethanol and Cytoseal  
216 (Fisher Scientific). The two datasets of congeners were pooled in statistical analyses.  
217 Quantile regression through the 10th and 90th percentile of the species means were used



218 to quantify the variation in traits associated with variation in genome size. Consistent with  
219 previous results across terrestrial vascular plants (Simonin and Roddy 2018), among  
220 *Rhododendron* taxa, there was greater variation in the sizes and packing densities of veins  
221 and stomata among species with smaller genomes (Figure 2). This was apparent due to  
222 significant differences between the 10<sup>th</sup> and 90<sup>th</sup> quantiles for guard cell length (10<sup>th</sup>:  $2.40 \pm$   
223  $1.14$ , 90<sup>th</sup>:  $-0.72 \pm 1.06$ ;  $F = 7.11$ ,  $P < 0.01$ ) and for stomatal density (10<sup>th</sup>:  $2.99 \pm 10.63$ , 90<sup>th</sup>:  
224  $-24.51 \pm 12.41$ ;  $F = 5.90$ ,  $P = 0.02$ ), but not for vein density (10<sup>th</sup>:  $0.14 \pm 0.20$ , 90<sup>th</sup>:  $-0.36 \pm$   
225  $0.19$ ;  $F = 3.22$ ,  $P = 0.07$ ). Further corroborating the significant differences between the 10<sup>th</sup>  
226 and 90<sup>th</sup> quantile slopes were the more negative slopes among higher quantiles of the data  
227 for all traits (Supplementary Figure S2), consistent with the results for guard cell volume  
228 among both angiosperms and vascular plants (Figures 1, S1). Thus, across phylogenetic  
229 scales, smaller genomes allow for greater variation in the sizes and packing densities of  
230 cells.

### 231 **Genome size limits maximum photosynthetic metabolism**

232 A major limitation on photosynthetic capacity is the ability to deliver resources to, and  
233 export products from, the sites of metabolic processing (Enquist et al. 1998; West et al.  
234 1999a; Brown et al. 2004). At the level of an individual cell—the fundamental unit of living  
235 organisms—rates of resource transport are strongly influenced by cell size because the ratio  
236 of cell surface area to cell volume increases exponentially with decreasing cell size. Because  
237 genome size constrains minimum cell size and the maximum packing densities of cells  
238 (Figures 1-2), genome size is predicted to limit the maximum rate of photosynthetic  
239 metabolism across vascular plants.

240 Previous work has hypothesized that genome size would be linked to maximum  
241 photosynthetic rate but found little support (Knight et al. 2005; Beaulieu et al. 2007). One  
242 major reason for not finding support is that these previous studies attempted to predict  
243 variation in  $A_{mass}$ , which accounts for the construction costs of leaves, rather than  $A_{area}$ ,  
244 which is the maximum metabolic rate regardless of the construction costs. As described  
245 above,  $A_{area}$  would define the maximum amount of carbon assimilated, but how the plant  
246 allocates the total assimilated carbon—to growth, reproduction, defense, more durable

247 leaves, etc.–would reflect the numerous factors that influence plant form and other aspects  
248 of plant function (Bazzaz et al. 1987). Thus,  $A_{area}$ , which is orthogonal to SLA and  $A_{mass}$   
249 (Wright et al. 2004), is predicted to be constrained by cell and genome sizes. Consistent  
250 with this prediction, genome size is a strong predictor of the sizes and densities of stomatal  
251 guard cells and leaf veins across vascular plants (Simonin and Roddy 2018), and we  
252 predicted, therefore, that genome size would, via its effects on the sizes and packing  
253 densities of cells, limit  $A_{area}$ . It is important to clarify that many factors can influence  $A_{area}$   
254 of a given leaf. For example, nutrient deficiency and water stress can reduce  $A_{area}$  below its  
255 theoretical maximum–independent of the effects of cell and genome size–by limiting either  
256 the biochemical or stomatal contributions to carbon assimilation. When these other factors  
257 are not limiting, then cell size is predicted to limit  $A_{area}$ , and, as a result, we predicted that  
258 genome size would define the upper limit (estimated using quantile regression) of  $A_{area}$ .

259 Data for area-based maximum photosynthetic rate were compiled from the primary  
260 literature (Supplemental Table 1) and merged with the Kew Plant DNA C-Values Database  
261 (Bennett and Leitch 2012). This dataset included 210 species, of which 138 were  
262 angiosperms, 46 were gymnosperms, and 26 were ferns. We tested whether genome size  
263 limits  $A_{area}$  using quantile regression. Like above, we estimated the upper limit of  $A_{area}$  as  
264 the 90<sup>th</sup> quantile, but include slope estimates across quantiles (Figure S3). Standard errors  
265 around these quantile slopes were estimated by bootstrapping 300 replicates. There is no  
266 phylogenetically corrected method for estimating quantile slopes, so we tested whether the  
267 pattern observed across all species was also apparent only among the angiosperms, which  
268 exhibit the largest range in genome size of the three main groups of vascular plants. This  
269 analysis helped to determine whether the effects of genome size on  $A_{area}$  were driven solely  
270 by the divergences between the three major clades.

271 Smaller genomes enabled higher maximum photosynthetic rates across and within major  
272 plant clades (Figure 3). Across all terrestrial vascular plants, the upper limit (the 90<sup>th</sup>  
273 quantile) of  $A_{area}$  was defined by genome size (slope =  $-0.18 \pm 0.03$ ). A nearly identical  
274 slope of the 90<sup>th</sup> quantile was apparent only among the angiosperms ( $-0.19 \pm 0.05$ ),  
275 suggesting that the effect of genome size on maximum  $A_{area}$  was not due solely to the  
276 divergences between the three major clades. Across all quantiles there was little difference

277 between the quantile slopes estimated for all species versus the angiosperms alone, and  
278 these quantile slopes were mostly within the confidence interval of the regression slope  
279 through the entire dataset (Figure S3).

280

281 The scaling relationship between  $A_{area}$  and genome size follows naturally from the  
282 relationships between genome size and the sizes and densities of veins and stomata.  
283 However, veins and stomata are not the only cells responsible for driving variation in  
284 photosynthetic rates. While the maximum rate of CO<sub>2</sub> diffusion into the leaf is defined by  
285 the sizes and densities of stomata (Franks and Beerling 2009), once inside the leaf, CO<sub>2</sub>  
286 must diffuse through the leaf intercellular airspace and into the chloroplasts lining the  
287 interior surfaces of mesophyll cells. Thus, the three-dimensional structure and organization  
288 of the mesophyll is predicted to be a prime target for selection on photosynthetic  
289 metabolism (Tholen et al. 2012; Ren et al. 2019) and to be critical to leaf photosynthetic  
290 function (Earles et al. 2019). The limited evidence on *Arabidopsis thaliana* mutants  
291 suggests that cell size is critical to this mesophyll architecture (Lehmeier et al. 2017). Based  
292 on the results presented here (Figure 3) and elsewhere (Simonin and Roddy 2018), we  
293 predict that the scaling relationships between genome size and cell size that coordinate  
294 veins and stomata extend also to the sizes of cells and their organization within the leaf  
295 mesophyll.

#### 296 **Genome size may limit the rate of metabolic up- or down-regulation**

297 Although maximum potential rate of leaf gas exchange is an important parameter  
298 determining a species' physiological capacity, the actual rate of leaf gas exchange at any  
299 given moment is often substantially lower, depending on a variety of physiological and  
300 environmental factors (e.g. light level, atmospheric humidity, leaf temperature, plant water  
301 status). Changes in sun angle, shading by passing clouds, and self-shading by fluttering  
302 leaves all drive changes in incoming solar radiation, and these rapid dynamics have  
303 influenced the evolution of photosynthetic biochemistry (Pearcy 1990). Under naturally  
304 varying conditions, leaf gas exchange fluctuates dramatically and rarely reaches its  
305 maximum rate, with greater variation occurring at the top of the plant canopy. How

306 frequently a leaf can reach its maximum gas exchange rate and how well it can optimize its  
307 physiological processes to environmental conditions depend on how rapidly the leaf can  
308 respond to dynamic, fluctuating conditions.

309 There is an emerging consensus that smaller stomata respond more rapidly to fluctuating  
310 conditions than larger stomata, allowing leaves with smaller stomata to more closely tune  
311 their physiological rates with environmental conditions (Drake et al. 2013; Lawson and  
312 Blatt 2014; Lawson and Vialet-Chabrand 2019). Leaf physiological processes change at  
313 different rates, with changes in stomatal conductance occurring an order of magnitude  
314 more slowly than changes in photosynthesis (McAusland et al. 2016). This difference in  
315 response times between physiological processes (e.g. photosynthetic assimilation rate and  
316 stomatal conductance) can reduce water use efficiency when stomata are closing and  
317 reduce photosynthetic efficiency when stomata are opening (Lawson and Vialet-Chabrand  
318 2019), limiting total photosynthesis by up to 20% (Lawson and Blatt 2014). If stomatal  
319 response times are directly limited by the size of stomata then genome-cellular allometry  
320 may limit not only the maximum rate of metabolism but also how quickly metabolism can  
321 respond to fluctuating environmental conditions. Of the species for which stomatal  
322 response times were measured by McAusland et al. (2016) and Drake et al. (2013), twelve  
323 were included in the Kew Plant DNA C-Values database. Consistent with previous reports,  
324 there was a positive correlation between genome size and guard cell length ( $R^2 = 0.36$ ,  $P <$   
325  $0.05$ ; Figure 4a), and stomatal response rate exhibited a triangular relationship with  
326 genome size such that smaller genomes exhibited both higher maximum stomatal response  
327 rates but also a greater variation in stomatal response rate. While the available data on  
328 stomatal response rates measured using standard protocols are limited, these preliminary  
329 results suggest that genome size indirectly limits the maximum rate of stomatal opening  
330 and closing via its effects on the sizes and densities of stomata.

## 331 **How genome size-metabolism scaling may impact plant biogeography**

### 332 **Polyploidy thought to increase niche breadth**

333 Variation in genome size and structure associated with polyploidization has long been  
334 considered to be an important driver of plant evolution and to be associated with shifts in  
335 environmental tolerances, habitat breadth, trait variation, and interspecific interactions  
336 (Stebbins 1940; Otto and Whitton 2000; Soltis et al. 2003; Soltis et al. 2014; Barker et al.  
337 2016a,b), and niche differentiation between polyploids and their diploid parentals has  
338 been considered a prerequisite for the successful establishment of newly arisen polyploids  
339 (Levin 1975; Fowler & Levin, 1984). Describing the types of polyploids and how they are  
340 has been thoroughly reviewed elsewhere (e.g. Stebbins 1947; Soltis et al. 2015), and we  
341 focus our discussion here on how and why ploidy—via its relationship with genome size—  
342 may or may not correlate with species distributions and habitat breadth. Until they can be  
343 more rigorously tested, these ideas will remain speculative.

344 Polyploids have been hypothesized to be better adapted to extreme habitats, to have  
345 greater hardiness, and to have greater ecological adaptability (reviewed by Stebbins 1985;  
346 Brochmann et al. 2004). The possible mechanisms for these effects can be roughly grouped  
347 into two categories: one involving the genetic and genic content of the polyploid genome  
348 and one involving the nucleotypic effects of ploidy and genome size. Because polyploid  
349 genomes commonly have additional genome copies, they have higher absolute genic  
350 contents, would enable neofunctionalization of duplicated genes, and typically have higher  
351 heterozygosity, all of which can promote higher tolerances of environmental conditions.  
352 The nucleotypic effects of ploidal variation, though long recognized (Stebbins 1940), are  
353 often confounded with nucleotypic effects of genome size variation.

354 While ploidy and genome size are commonly assumed to be synonymous, at broad  
355 phylogenetic scales there is generally no relationship between genome size and ploidy  
356 (Leitch and Bennett 2004), reflecting the complex history of both ancient and  
357 contemporary whole genome duplications, particularly among the angiosperms (Jiao et al.  
358 2011; Clark and Donoghue 2018; Landis et al. 2018; Ren et al. 2018). In contrast to

359 pteridophytes, which also frequently undergo whole genome duplications (Clark et al.  
360 2016), angiosperm genomes readily rediploidize after polyploidization such that genome  
361 size and ploidy are positively correlated only for narrowly defined phylogenetic groups (i.e.  
362 within genera and families, Figure 5; Leitch and Bennett 2004; Dodsworth et al. 2016). If  
363 leaf and plant structure and function influence ecological tolerances and habitat breadth  
364 (i.e. if plant structure-function is adaptive), then the nucleotypic effects of genome size are  
365 predicted to influence environmental tolerances.

### 366 **Smaller genomes enable greater phenotypic plasticity**

367 One long-standing hypothesis is that higher ploidy is related to wider habitat breadth  
368 because polyploids can tolerate greater ecological stress. Higher ploidy is associated with  
369 greater heterozygosity (i.e. greater genetic diversity) and, frequently, higher genic content  
370 due to multiple genome copies, both of which are thought to promote plasticity and enable  
371 polyploids to withstand a greater range of environmental conditions than diploids.  
372 However, several studies testing this hypothesis have not observed polyploids to have  
373 greater habitat breadth (e.g. Stebbins 1985; Martin and Husband 2009; Glennon et al. 2014;  
374 Johnson et al. 2014). Furthermore, these tests frequently find that diploids exhibit greater  
375 habitat breadth than polyploids (Petit and Thompson 1999; Hijmans et al. 2007;  
376 Brittingham et al. 2018; Castro et al. 2019). One reason is that traits are not necessarily  
377 more variable in polyploids than in diploids (Stebbins 1985; Wei et al. 2018).

378 We predict that one reason ploidy is not commonly found to correlate with ecological  
379 breadth is because genome size—rather than ploidy per se—drives variation in the absolute  
380 range of potential cell sizes and, by extension, phenotypic plasticity in rates of resource  
381 transport and metabolism. Thus, the phylogenetic scale-dependence of the relationship  
382 between genome size and ploidy (Figure 5), particularly among the angiosperms, could  
383 lead to confounding patterns depending on the phylogenetic scale at which comparisons  
384 are made. For example, in the analysis of Rice et al. (2019), ploidy was determined relative  
385 to other closely related species, such that within genera or families ploidy and genome size  
386 are positively correlated, suggesting that the bias towards higher abundances of polyploids  
387 at higher latitudes may reflect nucleotypic effects of genome size on cell size and

388 metabolism. The complex, fluctuating process of polyploidization and rediploidization,  
389 which can winnow the genome nonrandomly (Wendel 2015), would promote the  
390 proliferation of beneficial elements associated with genome duplications (e.g. more gene  
391 copies that can neofunctionalize) while reducing the size of the genome needed to maintain  
392 high rates of development and metabolism (Table 1).

393 We posit here that the nucleotypic effects of genome size, regardless of ploidy, may  
394 influence environmental tolerances. Because smaller genomes allow for greater variation  
395 in cell size and metabolism (Figures 1-3), species with smaller genomes may be better able  
396 to fine tune their tissue structure to environmental conditions. This flexibility would allow  
397 species with smaller genomes to better optimize their metabolic rates in order to occupy a  
398 wider range of environmental conditions. Combined with the effects of genome size on  
399 rates of cell division (Van't Hof and Sparrow 1963; Van't Hof 1965; Šímová and Herben  
400 2012), the greater plasticity in cell size and higher metabolic rates attainable by species  
401 with small genomes may enable them to better colonize new habitats.

#### 402 **Community-scale patterns in genome size across gradients in productivity**

403 If habitats filter species based on rates of metabolism and if there are nucleotypic effects of  
404 genome size on metabolism, then community-scale distributions of genome size may vary  
405 across gradients of productivity. In habitats that can support high rates of productivity and  
406 primary metabolism, species with small genomes are expected to predominate because  
407 they can maintain higher rates of metabolism and more rapidly adjust their physiology to  
408 match environmental conditions. This strategy would be one of maintaining steady state  
409 physiological processes. At a broad scale, this prediction holds because angiosperms,  
410 which have, on average, smaller genomes than other vascular plants are dominant in most  
411 ecosystems, particularly those characterized by high productivity. However, high rates of  
412 metabolism and maintaining steady-state physiology, even among the angiosperms, are not  
413 always favorable. Two such habitats are those characterized by extreme water and nutrient  
414 limitation, such as deserts and epiphytic habitats, and by extreme cold, such as high  
415 latitudes. Higher incidences of polyploids have been commonly reported in higher latitudes

416 and among arctic floras (Brochmann et al. 2004; Rice et al. 2019), but arid habitats have  
417 received less attention.

418 Arid and epiphytic habitats are characterized by low productivity and may support species  
419 with large genomes. In these habitats, high rates of metabolism are not always favored,  
420 which may relax selection for small genomes. One strategy common in arid and epiphytic  
421 habitats is succulence, which is often associated with Crassulacean acid metabolism (CAM)  
422 photosynthesis. The CAM syndrome limits water loss by restricting CO<sub>2</sub> uptake and water  
423 loss to nighttime when humidity is high and the atmospheric demand for evaporation  
424 relatively low. As a result, CAM species typically rely more heavily on resource storage (e.g.  
425 CO<sub>2</sub>, H<sub>2</sub>O) or non-steady-state physiology to maintain photosynthetic metabolism and limit  
426 water loss. If metabolism is one agent of selection on genome size, then we would predict  
427 that in arid, resource poor environments, selection for small genomes (associated with  
428 small cells and high metabolic rates) may be weak among CAM species, allowing genomes  
429 of CAM species to expand in size. We tested this hypothesis using the taxonomic  
430 distributions of CAM photosynthesis from Smith and Winter (1996) and genome size data  
431 from the Kew Plant DNA C-Values Database (Bennett and Leitch 2012). For C3, we used the  
432 broad distribution of angiosperms reported in Simonin and Roddy (2018), which are  
433 representative of extant angiosperm diversity. We scored as CAM the narrowest taxonomic  
434 level in the Kew DNA C-Values Database that was listed as containing CAM by Smith and  
435 Winter (1996). For example, if a genus were listed as containing any CAM species, all  
436 species in the genus were assumed to exhibit CAM photosynthesis. This approach was  
437 biased against observing differences in genome size between C3 and CAM species because  
438 it necessarily grouped some C3 species as CAM. To account for phylogenetic history, we  
439 constructed a dated, family-level supertree using the methods described in Simonin and  
440 Roddy (2018), and compared C3 and CAM genome sizes using the *phylANOVA* function in  
441 'phytools' (Revell 2012). Log-normalized genome sizes were significantly larger among  
442 CAM species than among C3 species ( $t = 8.11$ ,  $df = 284.03$ ,  $P < 0.001$ ) even after accounting  
443 for shared phylogenetic history ( $t = 7.51$ ,  $P < 0.05$ ; Figure 6), consistent with the prediction  
444 that large genomes may evolve when selection for high rates of metabolism is weak.  
445 However, future analyses that incorporate better determination of the phylogenetic



446 distributions of photosynthetic pathways is needed to more rigorously test whether the  
447 evolution of CAM photosynthesis and its associated switch towards non-steady-state  
448 physiological processes is indeed associated with increases in genome size.

449 Arid, resource poor habitats are not exclusively composed of species with large genomes.  
450 Rather, they may harbor a diversity of strategies associated with divergent niches. In  
451 deserts, physiological strategies can be arrayed along a spectrum from strict non-steady-  
452 state physiology characterized by low rates of metabolism (e.g. obligate CAM) to quasi-  
453 steady-state physiology (e.g. C3 species) characterized by high rates of metabolism (Nobel  
454 and Jordan 1983; Hunt and Nobel 1987). While CAM species can rely on resource storage  
455 during periods of limited water availability, C3 species in deserts tend to function during a  
456 relatively narrow period of time when water is available. Thus, because their carbon gain is  
457 limited to such a short time period, C3 desert plants may have small genomes and cells that  
458 enable high rates of metabolism. In fact, desert shrubs have the highest rates of stem  
459 hydraulic conductance measured in C3 plants (Mencuccini 2003), and even among species  
460 from humid tropical forests, dry forest species have higher hydraulic conductance than wet  
461 forest species (Brenes-Arguedas et al. 2013). Thus, less productive habitats may select not  
462 simply for larger genomes but instead allow for multiple strategies that encompass a  
463 broader range of metabolic rates and, by extension, greater variation in genome size at the  
464 community level.

#### 465 **Smaller genomes increase the probability of invasiveness**

466 The multifaceted effects of genome size on plant structure, function, and ecology (Table 1)  
467 is particularly relevant to the study of invasive species. Identifying the traits that allow an  
468 introduced species to establish, naturalize, and invade into a new environment is a central  
469 aim of invasion biology (Simberloff 2011), with broader implications for plant  
470 biogeographic patterns. Here we distinguish between nonnative species—those that survive  
471 and reproduce in their introduced range—and nonnative invasive species—those that can  
472 disperse, establish, and spread far from their original source of introduction (Richardson et  
473 al. 2011). This distinction is important because prior studies on the traits of ‘invaders’  
474 focus on these different subsets of species, which have slightly different, but overlapping,

475 sets of traits that determine whether they can survive and reproduce versus invade non-  
476 native regions (Kleunen et al. 2015).

477 Early theory on the distinguishing traits of invasive plants postulated that “ideal weeds”  
478 should grow rapidly, produce seed continuously and in high number throughout the  
479 growing season, be tolerant to a wide range of environmental conditions, exhibit high trait  
480 plasticity, and be able to reproduce vegetatively from fragments (Baker 1974). On average,  
481 these predictions have been upheld, with nonnative invasive plants tending to exhibit traits  
482 consistent with high fitness (e.g. number of flowers, fruits, or seed or germination rates),  
483 high relative growth rates, high dispersal abilities (e.g. smaller seeds), and more efficient  
484 carbon-capture strategies (e.g. high specific leaf area), relative to co-occurring native  
485 species (Leishman et al. 2007; Kleunen et al. 2010; Ordonez et al. 2010; Kuester et al. 2014)  
486 or naturalized but not invasive nonnative species (Rejmánek and Richardson 1996;  
487 Gallagher et al. 2014). Combined, these traits confer a growth advantage, such that plants  
488 with small seeds can disperse further distances, have shorter generation times, and higher  
489 relative growth rates, owing to the greater rates of cell division and higher metabolic rates  
490 provided by smaller genomes (Pandit et al. 2014; Suda et al. 2015). Indeed, even within  
491 species, populations with smaller genomes are more likely to successfully invade new  
492 habitats (Pysek et al. 2018).

493 Because many of the traits linked with invasiveness can be influenced by both ploidy and  
494 genome size, both have been implicated as underlying features driving invasion (Pandit et  
495 al. 2014; Suda et al. 2015). Because polyploids are thought to be better able to tolerate  
496 environmental fluctuations and to be better able to adapt to new environments, polyploids  
497 tend to be overrepresented among nonnative invasives compared to native angiosperms  
498 (Rejmánek and Richardson 1996; Prentis et al. 2008; Beest et al. 2011; Pandit et al. 2014).

499 Similarly, nonnative invasive species tend to have smaller genomes than non-invasive  
500 plants (both native and non-native), which is thought to be due to the diverse effects of  
501 genome size on metabolism, rates of development and growth, and seed size (Rejmánek  
502 and Richardson 1996; Bennett et al. 1998; Kubešová et al. 2010; Pandit et al. 2014).

503 However, the complex, scale-dependent relationship between ploidy and genome size  
504 (Figure 5) complicates a clear understanding of the effects of ploidy versus genome size on

505 invasiveness (Rejmánek and Richardson 1996; Pandit et al. 2014). Because angiosperms,  
506 which predominate among nonnative invasives, readily rediploidize and downsize their  
507 genomes subsequent to whole genome duplications (Leitch and Bennett 2004), assessing  
508 the relative effects of ploidy versus genome size on invasiveness can be difficult. For  
509 example, the likelihood of being invasive increases with chromosome number and ploidy  
510 but decreases with genome size (Rejmánek and Richardson 1996; Pandit et al. 2014). The  
511 multiple paths to polyploidization and the selective retention of only certain parts of the  
512 genome during subsequent genome downsizing (Wendel 2015) could explain how both  
513 higher ploidy and smaller genomes are correlated with invasiveness.

## 514 **A possible role for metabolism in genome size evolution**

515 As the major source of energy and matter for the biosphere, photosynthetic metabolism  
516 represents a first-order control over ecological processes globally. This fundamental link  
517 between metabolic and ecological processes has driven the development of the Metabolic  
518 Theory of Ecology (MTE) that provides a mechanistic framework for predicting variation in  
519 organismal life history attributes, population dynamics, and larger scale ecosystem  
520 processes from organismal-level traits related to resource supply for metabolism (West et  
521 al. 1997; Enquist et al. 1998; West et al. 1999a; West et al. 1999b; West et al. 2002; Price et  
522 al. 2010). While appealing and seemingly endowed with incredible explanatory power, a  
523 number of criticisms of the theory and its assumptions have been consistently raised  
524 (Kozłowski and Konarzewski 2004; Kozłowski and Konarzewski 2005; Price et al. 2012).  
525 One primary assumption is that the sizes of terminal units in vascular networks (e.g.  
526 capillaries in circulatory systems or terminal veins in plant leaves) are invariant. The  
527 problems with this assumption have been thoroughly detailed for animal circulatory  
528 systems with the allometry of genome size and cell size emerging as a critical factor  
529 influencing how body size scales with metabolism (Kozłowski et al. 2003). Furthermore,  
530 the allometry of genome size and cell size (Figure 1) and the effects of genome size on  
531 maximum metabolic rate (Figure 3) presented here suggest that this assumption is violated  
532 in plants, as well. Modifications to the original model that relax some of its assumptions  
533 have improved model predictions for plants, particularly by allowing for variation in the  
534 packing of xylem conduits (Savage et al. 2010). However, the nucleotypic effects of genome

535 size have yet to be incorporated, although they may further improve models and help to  
536 clarify the constraints and major innovations driving botanical form, function, and  
537 diversity.

538  
539 The effects of genome size on cell sizes and packing densities across vascular plants  
540 (Figures 1,2; Beaulieu et al. 2008; Simonin and Roddy 2018) and the importance of cell size  
541 in metabolism (Savage et al. 2010) together suggest that there may be a role for  
542 metabolism in the evolution of genome size. While it is appealing to expect that genome  
543 size may predict metabolic rate, the effects of genome size are likely more nuanced.  
544 Because genome size defines only the lower limit of cell size, genome size may limit only  
545 the maximum possible rate of energy and matter exchange (Figure 3), rather than being a  
546 clear predictor of metabolism more generally. This suggests that evolutionary increases in  
547 metabolic capacity may be tied to the evolution of genome size, such as has been described  
548 in birds (Wright et al. 2014). How selection on genome size *per se* may be translated into  
549 alterations of genome sequence structure is unclear but would be an important step  
550 towards understanding the drivers of genome size variation. Independent evidence for the  
551 role of metabolism in shaping genome-cellular allometry can be evaluated by comparing  
552 structures with similar developmental origins such as flowers and leaves (Olson and  
553 Pittermann 2019). Flowers, unlike leaves, need not support high rates of energy and  
554 matter exchange for use in photosynthetic metabolism and generally have larger cells and  
555 lower cell packing densities than their conspecific leaf counterparts (Roddy et al. 2013,  
556 2019; Zhang et al. 2018; Roddy *in press*). Thus, under different selection regimes due to  
557 differences in metabolism, traits can diverge even within the same organism (Olson and  
558 Arroyo-Santos 2015). Furthermore, defining the biophysical limits of phenotypic variation  
559 is central to understanding the diversity of plant form and function, and our analyses  
560 suggest that genome size defines one bound to the range of possible cell sizes.

561

562 Table 1. Brief summary of traits shown previously to correlate with genome size.

563

| Sizes                                | Reference                                                          |
|--------------------------------------|--------------------------------------------------------------------|
| Pollen volume                        | Bennett 1972; Knight et al. 2010                                   |
| Cell mass                            | Martin 1966                                                        |
| Epidermal cell size                  | Beaulieu et al. 2008; Knight and Beaulieu 2008                     |
| Nuclear volume                       | Van't Hof and Sparrow 1963; Baetcke et al. 1967                    |
| Nuclear dry mass                     | Bennett et al. 1983; White and Rees 1987                           |
| Seed mass                            | Grotkopp et al. 2004; Beaulieu et al. 2007                         |
| Xylem vessel diameter                | Maherali et al. 2009; Hao et al. 2013; De Baerdemaeker et al. 2018 |
| Rates                                |                                                                    |
| Cell division rate, meiosis, mitosis | Van't Hof and Sparrow 1963; Van't Hof 1965; Bennett 1971           |
| Minimum generation time              | Bennett 1972                                                       |
| Leaf expansion rate                  | Grime et al. 1985                                                  |
| Phenology                            | Grime and Mowforth 1982                                            |
| Frost tolerance                      | MacGillivray and Grime 1995                                        |

564

565

566

567

## 568 **Figure legends**

569 Figure 1. Genome size determines the minimum size of cells, and smaller genomes enable  
570 greater variation in final cell size. Data for meristematic cells (blue triangles) were taken  
571 from Šímová and Herben (2012), and the solid black line is the regression through these  
572 points. Data for mature stomatal guard cells of extant plants (circles and squares) for ferns  
573 (dark green), gymnosperms (pink), and angiosperms (light blue) were taken from Simonin  
574 and Roddy (2018), and data for mosses and hornworts (light green) were taken from Field  
575 et al. (2015) and Renzaglia et al. (2017). The two dashed lines represent the 10th (lower)  
576 and 90th (upper) quantile regressions through mature guard cell data for vascular plants  
577 with their respective confidence intervals shaded. The dotted line represents the 90<sup>th</sup>  
578 quantile through all guard cell data (vascular and non-vascular plants).

579 Figure 2. Variation in the sizes and packing densities of stomatal guard cells and leaf veins  
580 with variation in genome size among *Rhododendron* sect. *Schistanthe* species (circles) and  
581 polyploid *Rhododendron* cultivars (triangles). Lines represent regressions through the 90th  
582 (upper) and 10th (lower) quantiles. These quantile regression were significantly different  
583 for guard cell length and stomatal density (dashed) but not for vein density (dotted).  
584 Genome size limits the lower limit of cell size and the upper limit of cell packing densities,  
585 and there is greater variation in anatomical traits among species with smaller genomes.

586 Figure 3. Genome size limits the maximum rate of photosynthesis ( $A_{area}$ ) across C3  
587 terrestrial plants. (a) Untransformed relationship and (b) log-transformed relationship.  
588 Dashed black lines are regressions through the upper 90th quantile of all data with grey  
589 shading representing the 95% confidence interval. Blue dashed lines and blue shading  
590 represent the 90<sup>th</sup> quantile regression and its 95% confidence interval for angiosperms  
591 alone, showing that the same slope defines the upper limit among only the angiosperms as  
592 across all three major clades of vascular plants.

593 Figure 4. Genome size may limit the maximum rate of stomatal response (i.e. how fast  
594 stomata can open or close). Data taken from McAusland et al. (2016) and Kew Plant DNA C-  
595 values Database.

596 Figure 5. Relationship between genome size and ploidy for angiosperms. Each line  
597 represents the linear regression within a genus. At narrow taxonomic scales, ploidy and  
598 genome size are correlated, but at broad taxonomic scales (i.e. among all angiosperms),  
599 there is no relationship between genome size and ploidy due to rediploidization.

600 Figure 6. Distributions of genome size for C3 and CAM species show CAM lineages have  
601 significantly larger genomes than C3 lineages. Lineages identified as CAM likely include  
602 many C3 species; see text for details on identification of photosynthetic pathways. There  
603 was a significant difference in log-normalized genome size for the two photosynthetic  
604 pathways, even after accounting for shared phylogenetic history.

605

606 Figure S1. Quantile regression slopes and bootstrapped standard errors for of cell volume  
607 and genome size data plotted in Figure 1 for vascular plants. Quantiles were calculated for  
608 every 5% of the data (5% to 95%) for all vascular plants (ferns, gymnosperms,  
609 angiosperms; black points) and for angiosperms only (blue points). Points are jittered  
610 horizontally so they do not plot on top of each other. The OLS slope through the entire  
611 dataset (solid red line) and its confidence interval (dotted red lines) are included for  
612 comparison. Lower quantiles of the data have consistently steeper slopes.

613

614 Figure S2. Quantile regression slopes and bootstrapped confidence intervals for (a) guard  
615 cell length, (b) stomatal density, and (c) vein density of *Rhododendron* subsect. *Schistanthe*  
616 species and *Rhododendron* cultivars. Original data plotted in Figure 2. Quantiles were  
617 calculated for every 5% of the data (5% to 95%), with standard errors estimated by  
618 bootstrapping 300 replicated. The OLS slope (solid red line) and its confidence interval  
619 (dotted red lines) are included for comparison. For all three traits, lower quantiles of the  
620 data have consistently steeper slopes.

621

622 Figure S3. Quantile regression slopes and bootstrapped standard errors for  $A_{area}$  and  
623 genome size data plotted in Figure 3. Quantiles were calculated for every 5% of the data  
624 (5% to 95%) for all vascular plants (ferns, gymnosperms, angiosperms; black points) and  
625 for angiosperms only (blue points). Points are jittered horizontally so they do not plot on  
626 top of each other. The OLS slope through the entire dataset (solid red line) and its  
627 confidence interval (dotted red lines) are included for comparison. Lower quantiles of the  
628 data have consistently steeper slopes.

629



630 **References**

- 631 Baetcke K, A Sparrow, C Nauman, SS Schwemmer 1967 The relationship of DNA content to  
632 nuclear and chromosome volumes and to radiosensitivity (LD50). Proceedings of  
633 the National Academy of Sciences of the United States of America 58:533.
- 634 Bailey IW, WW Tupper 1918 Size variation in tracheary cells: I. a comparison between the  
635 secondary xylems of vascular cryptograms, gymnosperms and angiosperms.  
636 Proceedings of the American Academy of Arts and Sciences 54:149–204.
- 637 Baker HG 1974 The evolution of weeds. Annual Review of Ecology and Systematics 5:1–24.
- 638 Barker MS, N Arrigo, AE Baniaga, Z Li, DA Levin 2016a On the relative abundance of  
639 autopolyploids and allopolyploids. New Phytologist 210:391–398.
- 640 Barker MS, BC Husband, JC Pires 2016b Spreading Winge and flying high: The evolutionary  
641 importance of polyploidy after a century of study. American Journal of Botany  
642 103:1139–1145.
- 643 Bazzaz FA, NR Chiariello, P Coley, LF Pitelka 1987 Allocating resources to reproduction and  
644 defense. BioScience 37:58–67.
- 645 Beaulieu JM, IJ Leitch, CA Knight 2007 Genome size evolution in relation to leaf strategy  
646 and metabolic rates revisited. Annals of Botany 99:495–505.
- 647 Beaulieu JM, AT Moles, IJ Leitch, MD Bennett, JB Dickie, CA Knight. 2007. Correlated  
648 evolution of genome size and seed mass. New Phytologist 173:422-437.
- 649 Beaulieu JM, IJ Leitch, S Patel, A Pendharkar, CA Knight 2008 Genome size is a strong  
650 predictor of cell size and stomatal density in angiosperms. New Phytologist  
651 179:975–986.
- 652 Beest M te, JJ Le Roux, DM Richardson, AK Brysting, J Suda, M Kubešová, P Pyšek 2011 The  
653 more the better? The role of polyploidy in facilitating plant invasions. Annals of  
654 Botany 109:19–45.

- 655 Bennett M, J Heslop-Harrison, J Smith, J Ward 1983 DNA density in mitotic and meiotic  
656 metaphase chromosomes of plants and animals. *Journal of Cell Science* 63:173–179.
- 657 Bennett MD 1971 The duration of meiosis. *Proceedings of the Royal Society B* 178:277–  
658 299.
- 659 Bennett MD 1972 Nuclear DNA content and minimum generation time in herbaceous  
660 plants. *Proceedings of the Royal Society of London Series B Biological Sciences*  
661 181:109–135.
- 662 Bennett MD, IJ Leitch 2005 The evolution of the genome. In: Gregory TR, editor. Elsevier.  
663 pp. 89–162.
- 664 ——— 2012 Plant DNA C-values database (release 6.0). <http://data.kew.org/cvalues/>
- 665 Bennett MD, IJ Leitch, L Hanson 1998 DNA amounts in two samples of angiosperm weeds.  
666 *Annals of Botany* 82:121–134.
- 667 Brenes-Arguedas T, AB Roddy, TA Kursar 2013 Plant traits in relation to the performance  
668 and distribution of woody species in wet and dry tropical forest types in Panama.  
669 *Functional Ecology* 27:392–402.
- 670 Brittingham HA, MH Koski, T-L Ashman 2018 Higher ploidy is associated with reduced  
671 range breadth in the Potentilleae tribe. *American Journal of Botany* 105:700–710.
- 672 Brochmann C, A Brysting, I Alsos, L Borgen, H Grundt, A-C Scheen, R Elven 2004 Polyploidy  
673 in arctic plants. *Biological Journal of the Linnean Society* 82:521–536.
- 674 Brown JH, JF Gillooly, AP Allen, VM Savage, GB West 2004 Toward a metabolic theory of  
675 ecology. *Ecology* 85:1771–1789.
- 676 Castro M, J Loureiro, M Serran, D Tavares, BC Husband, C Siopa, S Castro 2019 Mosaic  
677 distribution of cytotypes in a mixed-ploidy plant species, *Jasione montana*: nested  
678 environmental niches but low geographical overlap. *Botanical Journal of the*  
679 *Linnean Society* 190:51–66.

- 680 Cavalier-Smith T 1978 Nuclear volume control by nucleoskeletal DNA, selection for cell  
681 volume and cell growth rate, and the solution of the DNA c-value paradox. *Journal of*  
682 *Cell Science* 34:247–278.
- 683 ——— 1982 Skeletal DNA and the evolution of genome size. *Annual Review of Biophysics*  
684 *and Bioengineering* 11:273–302.
- 685 Chamberlain S 2016 brranching: Fetch 'phylogenies' from many sources. <[https://CRAN.R-](https://CRAN.R-project.org/package=brranching)  
686 [project.org/package=brranching](https://CRAN.R-project.org/package=brranching)>
- 687 Clark J, O Hidalgo, J Pellicer, H Liu, J Marquardt, Y Robert, M Christenhusz, S Zhang, M Gibby,  
688 IJ Leitch, et al. 2016 Genome evolution of ferns: Evidence for relative stasis of  
689 genome size across the fern phylogeny. *New Phytologist* 210:1072–1082.
- 690 Clark JW, PC Donoghue 2018 Whole-genome duplication and plant macroevolution. *Trends*  
691 *in Plant Science*.
- 692 de Baerdemaeker NJF, N Hias, J van den Bulcke, W Keulemans, K Steppe 2018 The effect of  
693 polyploidization on tree hydraulic functioning. *American Journal of Botany*  
694 105:161–171.
- 695 Dodsworth S, M Chase, AR Leitch 2016 Is post-polyploidization diploidization the key to the  
696 evolutionary success of the angiosperms? *Botanical Journal of the Linnean Society*  
697 180:1–5.
- 698 Dolezel J, J Greilhuber, J Suda 2007 Estimation of nuclear DNA content in plants using flow  
699 cytometry. *Nature Protocols* 2:2233–44.
- 700 Doyle JJ, JE Coate 2019 Polyploidy, the nucleotype, and novelty: The impact of genome  
701 doubling on the biology of the cell. *International Journal of Plant Sciences* 180:1–52.
- 702 Drake PL, RH Froend, PJ Franks 2013 Smaller, faster stomata: Scaling of stomatal size, rate  
703 of response, and stomatal conductance. *Journal of Experimental Botany* 64:495–505.

- 704 Earles JM, TN Buckley, CR Brodersen, FA Busch, FJ Cano, B Choat, JR Evans, GD Farquhar, R  
705 Harwood, M Huynh, et al. 2019 Embracing 3D complexity in leaf carbon–water  
706 exchange. *Trends in Plant Science* 24:15–24.
- 707 Enquist BJ, JH Brown, GB West 1998 Allometric scaling of plant energetics and population  
708 density. *Nature* 395:163–165.
- 709 Field KJ, JG Duckett, DD Cameron, S Pressel 2015 Stomatal density and aperture in non-  
710 vascular land plants are non-responsive to above-ambient atmospheric CO<sub>2</sub>  
711 concentrations. *Annals of Botany* 115:915–922.
- 712 Fowler NL, Levin DA 1984 Ecological constraints on the establishment of a novel polyploid  
713 in competition with its diploid progenitor. *American Naturalist* 124:703-711.
- 714 Franks PJ, DJ Beerling 2009 Maximum leaf conductance driven by CO<sub>2</sub> effects on stomatal  
715 size and density over geologic time. *Proceedings of the National Academy of*  
716 *Sciences* 106:10343–10347.
- 717 Gallagher RV, RP Randall, MR Leishman 2014 Trait differences between naturalized and  
718 invasive plant species independent of residence time and phylogeny. *Conservation*  
719 *Biology* 29:360–369.
- 720 Glennon KL, Ritchie ME, Segraves KA 2014 Evidence for shared broad-scale climatic niches  
721 of diploid and polyploid plants. *Ecology Letters* 17: 574-582.
- 722 Goetsch LA, LA Craven, BD Hall 2011 Major speciation accompanied the dispersal of *Vireya*  
723 *Rhododendrons* (Ericaceae, *Rhododendron* sect. *Schistanthe*) through the Malayan  
724 archipelago: Evidence from nuclear gene sequences. *Taxon* 60:1015–1028.
- 725 Grime J 1998 Plant classification for ecological purposes: Is there a role for genome size?  
726 *Annals of Botany* 82:117–120.
- 727 Grime J, M Mowforth 1982 Variation in genome size—an ecological interpretation. *Nature*  
728 299:151.

- 729 Grime J, J Shacklock, S Band 1985 Nuclear DNA contents, shoot phenology and species co-  
730 existence in a limestone grassland community. *New Phytologist* 100:435–445.
- 731 Grotkopp E, M Rejmánek, M Sanderson, TL Rost 2004 Evolution of genome size in pines  
732 (*Pinus*) and its life-history correlates: supertree analyses. *Evolution* 58:1705–1729.
- 733 Hao G-Y, ME Lucero, SC Sanderson, EH Zacharias, NM Holbrook 2013 Polyploidy enhances  
734 the occupation of heterogeneous environments through hydraulic related trade-offs  
735 in *Atriplex canescens* (Chenopodiaceae). *New Phytologist* 197:970–978.
- 736 Hetherington A, F Woodward 2003 The role of stomata in sensing and driving  
737 environmental change. *Nature* 424:901–908.
- 738 Hijmans RJ, T Gavrilenko, S Stephenson, J Bamberg, A Salas, DM Spooner 2007 Geographical  
739 and environmental range expansion through polyploidy in wild potatoes (*Solanum*  
740 section *petota*). *Global Ecology and Biogeography* 16:485–495.
- 741 Hunt ER, PS Nobel 1987 Non-steady state water flow for three desert perennials with  
742 different capacitances. *Australian Journal of Plant Physiology* 14:363-375.
- 743 Hof JV 1965 Relationships between mitotic cycle duration, S period duration and the  
744 average rate of DNA synthesis in the root meristem cells of several plants.  
745 *Experimental Cell Research* 39:48–58.
- 746 Jiao Y, NJ Wickett, S Ayyampalayam, AS Chanderbali, L Landherr, PE Ralph, LP Tomsho, Y  
747 Hu, H Liang, PS Soltis, et al. 2011 Ancestral polyploidy in seed plants and  
748 angiosperms. *Nature* 473:97–100.
- 749 Johnson AL, R Govindarajulu, T-L Ashman 2014 Bioclimatic evaluation of geographical  
750 range in *Fragaria* (Rosaceae): Consequences of variation in breeding system, ploidy  
751 and species age. *Botanical journal of the Linnean Society* 176:99–114.
- 752 Kleunen M van, W Dawson, N Maurel 2015 Characteristics of successful alien plants.  
753 *Molecular Ecology* 24:1954–1968.

- 754 Kleunen M van, E Weber, M Fischer 2010 A meta-analysis of trait differences between  
755 invasive and non-invasive plant species. *Ecology Letters* 13:235–245.
- 756 Knight CA, JM Beaulieu 2008 Genome size scaling through phenotype space. *Annals of*  
757 *Botany* 101:759–766.
- 758 Knight CA, NA Molinari, DA Petrov 2005 The large genome constraint hypothesis:  
759 evolution, ecology and phenotype. *Annals of Botany* 95:177–190.
- 760 Knight CA, RB Clancy, L Götzenberger, L Dann, JM Beaulieu. 2010. On the relationship  
761 between pollen size and genome size. *Journal of Botany* 2010:612017..
- 762 Kozłowski J, M Konarzewski 2004 Is West, Brown and Enquist’s model of allometric scaling  
763 mathematically correct and biologically relevant? *Functional Ecology* 18:283–289.
- 764 Kozłowski J, M Konarzewski 2005 West, Brown and Enquist’s model of allometric scaling  
765 again: the same questions remain. *Functional Ecology* 19:739–743.
- 766 Kozłowski J, M Konarzewski, AT Gawelczyk 2003 Cell size as a link between noncoding  
767 DNA and metabolic rate scaling. *Proceedings of the National Academy of Sciences*  
768 100:14080–14085.
- 769 Kubešová M, L Moravcova, J Suda, V Jarošík, P Pyšek, others 2010 Naturalized plants have  
770 smaller genomes than their non-invading relatives: A flow cytometric analysis of the  
771 Czech alien flora. *Preslia* 82:81–96.
- 772 Kuester A, JK Conner, T Culley, RS Baucom 2014 How weeds emerge: A taxonomic and  
773 trait-based examination using united states data. *New Phytologist* 202:1055–1068.
- 774 Landis JB, DE Soltis, Z Li, HE Marx, MS Barker, DC Tank, PS Soltis 2018 Impact of whole-  
775 genome duplication events on diversification rates in angiosperms. *American*  
776 *Journal of Botany* 105:348–363.
- 777 Lawson T, MR Blatt 2014 Stomatal size, speed, and responsiveness impact on  
778 photosynthesis and water use efficiency. *Plant Physiology* 164:1556–1570.

- 779 Lawson T, S Violet-Chabrand 2019 Speedy stomata, photosynthesis and plant water use  
780 efficiency. *New Phytologist* 221:93–98.
- 781 Lehmeier C, R Pajor, MR Lundgren, A Mathers, J Sloan, M Bauch, A Mitchell, C Bellasio, A  
782 Green, D Bouyer, et al. 2017 Cell density and airspace patterning in the leaf can be  
783 manipulated to increase leaf photosynthetic capacity. *The Plant Journal* 92:981–994.
- 784 Leishman MR, T Haslehurst, A Ares, Z Baruch 2007 Leaf trait relationships of native and  
785 invasive plants: community- and global-scale comparisons. *New Phytologist*  
786 176:635–643.
- 787 Leitch I, M Bennett 2004 Genome downsizing in polyploid plants. *Biological journal of the*  
788 *Linnean Society* 82:651–663.
- 789 Levin DA 1975 Minority cytotype exclusion in local plant populations. *Taxon* 24:35-43.
- 790 Lomax BH, J Hilton, RM Bateman, GR Upchurch, JA Lake, IJ Leitch, A Cromwell, CA Knight  
791 2013 Reconstructing relative genome size of vascular plants through geological  
792 time. *New Phytologist* 201:636–644.
- 793 MacGillivray CW, J Grime 1995 Genome size predicts frost resistance in British herbaceous  
794 plants: Implications for rates of vegetation response to global warming. *Functional*  
795 *Ecology* 9:320–325.
- 796 Magallón S, S Gómez-Acevedo, LL Sánchez-Reyes, T Hernández-Hernández 2015 A  
797 metacalibrated time-tree documents the early rise of flowering plant phylogenetic  
798 diversity. *New Phytologist* 207:437–453.
- 799 Maherali H, AE Walden, BC Husband 2009 Genome duplication and the evolution of  
800 physiological responses to water stress. *New Phytologist* 184:721–731.
- 801 Martin PG 1966 Variation in the amounts of nucleic acids in the cells of different species of  
802 higher plants. *Exp Cell Res* 44:84–94.
- 803 Martin SL, BC Husband 2009 Influence of phylogeny and ploidy on species ranges of north  
804 american angiosperms. *Journal of Ecology* 97:913–922.

- 805 McAusland L, S Violet-Chabrand, P Davey, NR Baker, O Brendel, T Lawson 2016 Effects of  
806 kinetics of light-induced stomatal responses on photosynthesis and water-use  
807 efficiency. *New Phytologist* 211:1209–1220.
- 808 Melaragno JE, B Mehrotra, AW Coleman 1993 Relationship between endopolyploidy and  
809 cell size in epidermal tissue of arabidopsis. *The Plant Cell* 5:1661–1668.
- 810 Mencuccini M 2003 The ecological significance of long-distance water transport: Short-  
811 term regulation, long-term acclimation and the hydraulic costs of stature across  
812 plant life forms. *Plant, Cell & Environment* 26:163–182.
- 813 Nobel PS, PW Jordan 1983 Transpiration stream of desert species: resistances and  
814 capacitances for a C3, a C4, and a CAM plant. *Journal of Experimental Botany*  
815 34:1379-1391.
- 816 Olson ME and A Arroyo-Santos 2015 How to study adaptation (and why to do it that way).  
817 *The Quarterly Review of Biology* 90:167-191.
- 818 Olson ME, J Pittermann 2019 Cheap and attractive: water relations and floral adaptation.  
819 *New Phytologist* 223:8-10.
- 820 Ordonez A, IJ Wright, H Olf 2010 Functional differences between native and alien species:  
821 a global-scale comparison. *Functional Ecology* 24:1353–1361.
- 822 Otto SP, J Whitton 2000 Polyploid incidence and evolution. *Annual Review of Genetics*  
823 34:401–437.
- 824 Pandit MK, SM White, MJO Pocock 2014 The contrasting effects of genome size,  
825 chromosome number and ploidy level on plant invasiveness: a global analysis. *New*  
826 *Phytologist* 203:697–703.
- 827 Pearcy RW 1990 Sunflecks and photosynthesis in plant canopies. *Annual Review of Plant*  
828 *Biology* 41:421–453.
- 829 Petit C, JD Thompson 1999 Species diversity and ecological range in relation to ploidy level  
830 in the flora of the Pyrenees. *Evolutionary Ecology* 13:45–65.



- 831 Poorter H, C Remkes 1990 Leaf area ratio and net assimilation rate of 24 wild species  
832 differing in relative growth rate. *Oecologia* 83:553–559.
- 833 Poorter H, C Remkes, H Lambers 1990 Carbon and nitrogen economy of 24 wild species  
834 differing in relative growth rate. *Plant physiology* 94:621–627.
- 835 Prentis PJ, JR Wilson, EE Dormontt, DM Richardson, AJ Lowe 2008 Adaptive evolution in  
836 invasive species. *Trends in Plant Science* 13:288–294.
- 837 Price CA, JF Gilooly, AP Allen, JS Weitz, KJ Niklas 2010 The metabolic theory of ecology:  
838 Prospects and challenges for plant biology. *New Phytologist* 188:696–710.
- 839 Price CA, JS Weitz, VM Savage, J Stegen, A Clarke, DA Coomes, PS Dodds, RS Etienne, AJ  
840 Kerkhoff, K McCulloh, et al. 2012 Testing the metabolic theory of ecology. Chave J,  
841 editor. *Ecology Letters* 15:1465–1474.
- 842 Pysek P, H Skalova, J Cuda, W-Y Guo, J Suda, J Dolezal, O Kauzal, C Lambertini, M Lucanova,  
843 T Mandakova, et al. 2018 Small genome separates native and invasive populations in  
844 an ecologically important cosmopolitan grass. *Ecology* 99:79–90.
- 845 Reich P, M Walters, D Ellsworth 1992 Leaf life-span in relation to leaf, plant, and stand  
846 characteristics among diverse ecosystems. *Ecological monographs* 62:365–392.
- 847 Rejmánek M, DM Richardson 1996 What attributes make some plant species more  
848 invasive? *Ecology* 77:1655–1661.
- 849 Ren R, H Wang, C Guo, N Zhang, L Zeng, Y Chen, H Ma, J Qi 2018 Wide-spread whole genome  
850 duplications contribute to genome complexity and species diversity in angiosperms.  
851 *Molecular Plant* 11:414–428.
- 852 Ren T, SM Weraduwage, TD Sharkey 2019 Prospects for enhancing leaf photosynthetic  
853 capacity by manipulating mesophyll cell morphology. *Journal of Experimental*  
854 *Botany* 70:1153–1165.

- 855 Renzaglia KS, JC Villarreal, BT Piatkowski, JR Lucas, A Merced 2017 Hornwort stomata:  
856 Architecture and fate shared with 400-million-year-old fossil plants without leaves.  
857 Plant Physiology 174:788–797.
- 858 Revell LJ 2012 phytools: an R package for phylogenetic comparative biology (and other  
859 things). Methods in Ecology and Evolution 3:217-223.
- 860 Rice A, P Šmarda, M Novosolov, M Drori, L Glick, N Sabath, S Meiri, J Belmaker, I Mayrose  
861 2019 The global biogeography of polyploid plants. Nature Ecology & Evolution  
862 3:265–273.
- 863 Richardson DM, P Pyšek, JT Carlton 2011 A compendium of essential concepts and  
864 terminology in invasion ecology. In: Fifty years of invasion ecology: The legacy of  
865 Charles Elton. Wiley-Blackwell Oxford, UK. pp. 409–420.
- 866 Roddy AB, CM Guilliams, T Lilittham, J Farmer, V Wormser, T Pham, PVA Fine, TS Field, TE  
867 Dawson 2013 Uncorrelated evolution of leaf and petal venation patterns across the  
868 angiosperm phylogeny. Journal of Experimental Botany 64:4081-4088.
- 869 Roddy AB, G-F Jiang, K-F Cao, KA Simonin, CR Brodersen 2019 Hydraulic traits are more  
870 diverse in flowers than in leaves. New Phytologist 223:193-203.
- 871 Roddy AB (*in press*) Energy balance implications of floral trait involved in pollinator  
872 attraction and water balance. International Journal of Plant Sciences.
- 873 von Sachs J 1893 Physiologische Notizen. vi. Über einige Beziehungen der spezifischen  
874 Grösse der Pflanzen zu ihren Organisation. Flora 77:49–81.
- 875 Savage VM, LP Bentley, BJ Enquist, JS Sperry, DD Smith, PB Reich, EI von Allmen 2010  
876 Hydraulic trade-offs and space filling enable better predictions of vascular structure  
877 and function in plants. Proceedings of the National Academy of Sciences 107:22722–  
878 22727.
- 879 Simonin KA, AB Roddy 2018 Genome downsizing, physiological novelty, and the global  
880 dominance of flowering plants. PLoS Biology 16:e2003706.

- 881 Smith J, K Winter 1996 Crassulacean acid metabolism. In: Winter K; Smith J, editors.  
882 Springer Verlag: Berlin. pp. 427–436.
- 883 Soltis DE, PS Soltis, JA Tate 2003 Advances in the study of polyploidy since plant speciation.  
884 New Phytologist 161:173–191.
- 885 Soltis DE, CJ Visger, PS Soltis 2014 The polyploidy revolution then...and now: Stebbins  
886 revisited. American Journal of Botany 101:1057–1078.
- 887 Soltis PS, DB Marchant, Y Van de Peer, DE Soltis 2015 Polyploidy and genome evolution in  
888 plants. Current Opinion in Genetics & Development 35:119–125.
- 889 Stebbins GL 1940 The significance of polyploidy in plant evolution. The American  
890 Naturalist 74:54–66.
- 891 Stebbins GL 1985 Polyploidy, hybridization, and the invasion of new habitats. Annals of the  
892 Missouri Botanical Garden:824–832.
- 893 Stebbins Jr GL 1947 Types of polyploids: Their classification and significance. In: Advances  
894 in genetics. Vol. 1. Elsevier. pp. 403–429.
- 895 Suda J, LA Meyerson, IJ Leitch, P Pysek 2015 The hidden side of plant invasions: The role of  
896 genome size. New Phytologist 205:994–1007.
- 897 Šímová I, T Herben 2012 Geometrical constraints in the scaling relationships between  
898 genome size, cell size and cell cycle length in herbaceous plants. Proceedings of the  
899 Royal Society B: Biological Sciences 279:867–875.
- 900 Tholen D, C Boom, X-G Zhu 2012 Prospects for improving photosynthesis by altering leaf  
901 anatomy. Plant Science 197:92–101.
- 902 Van't Hof J, AH Sparrow 1963 A relationship between dna content, nuclear volume, and  
903 minimum mitotic cycle time. Proceedings of the National Academy of Sciences of the  
904 United States of America 49:897.

- 905 Violle C, M-L Navas, D Vile, E Kazakou, C Fortunel, I Hummel, E Garnier 2007 Let the  
906 concept of trait be functional! *Oikos* 116:882–892.
- 907 Webb CO, DD Ackerly, SW Kembel 2008 Phylocom: Software for the analysis of  
908 phylogenetic community structure and trait evolution. *Bioinformatics* 24:2098–  
909 2100.
- 910 Wei N, R Cronn, A Liston, T Ashman 2018 Functional trait divergence and trait plasticity  
911 confer polyploid advantage in heterogeneous environments. *New Phytologist*  
912 221:2286–2297.
- 913 Wendel JF 2015 The wondrous cycles of polyploidy in plants. *American Journal of Botany*  
914 102:1753–1756.
- 915 West GB, JH Brown, BJ Enquist 1997 A general model for the origin of allometric scaling  
916 laws in biology. *Science* 276:122–126.
- 917 ——— 1999a A general model for the structure and allometry of plant vascular systems.  
918 *Nature* 400:664–667.
- 919 ——— 1999b The fourth dimension of life: Fractal geometry and allometric scaling of  
920 organisms. *Science* 284:1677–1679.
- 921 West GB, WH Woodruff, JH Brown 2002 Allometric scaling of metabolic rate from  
922 molecules and mitochondria to cells and mammals. *Proceedings of the National*  
923 *Academy of Sciences* 99:2473–2478.
- 924 White J, H Rees 1987 Chromosome weights and measures in *Petunia*. *Heredity* 58:139.
- 925 Wright IJ, PB Reich, M Westoby, DD Ackerly, Z Baruch, F Bongers, J Cavender-Bares, T  
926 Chapin, JH Cornelissen, M Diemer, et al. 2004 The worldwide leaf economics  
927 spectrum. *Nature* 428:821.
- 928 Wright NA, TR Gregory, CC Witt 2014 Metabolic 'engines' of flight drive genome size  
929 reduction in birds. *Proceedings of the Royal Society B* 281: 20132780.

930 Zhang F-P, MR Carins Murphy, AA Cardoso, GJ Jordan, TJ Brodribb 2018 Similar geometric  
931 rules govern the distribution of veins and stomata in petals, sepals and leaves. New  
932 Phytologist 219:1224-1234.

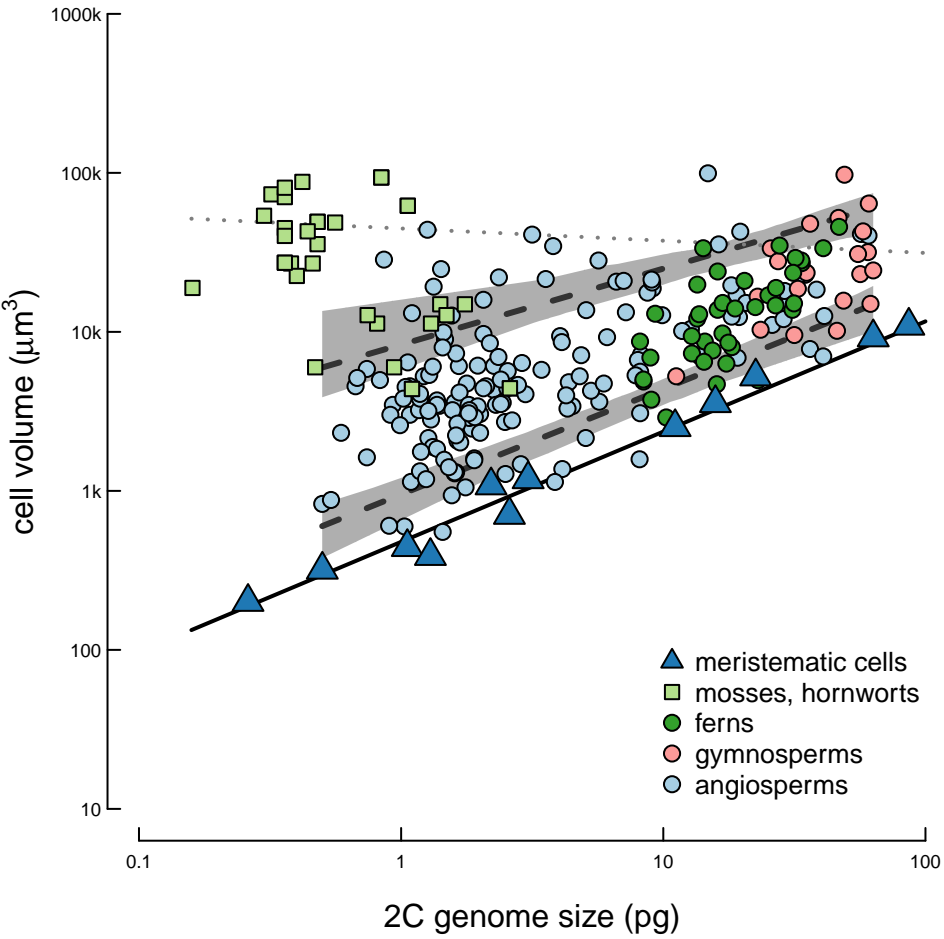

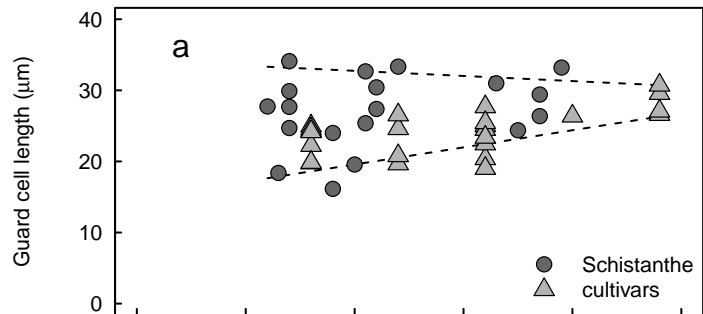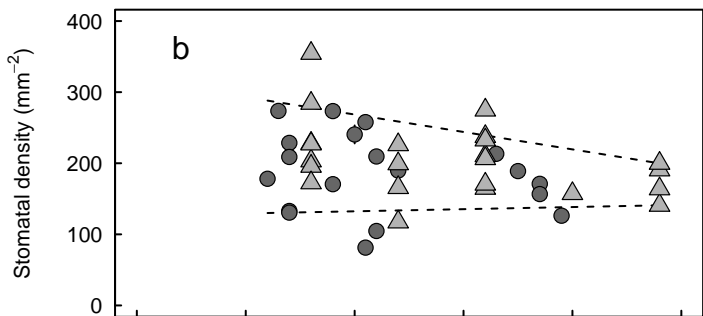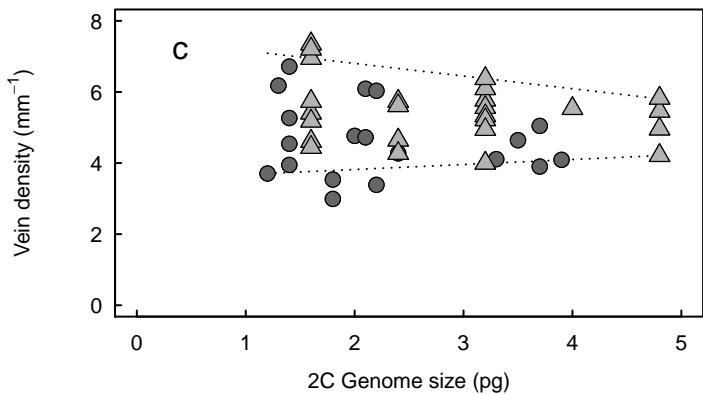

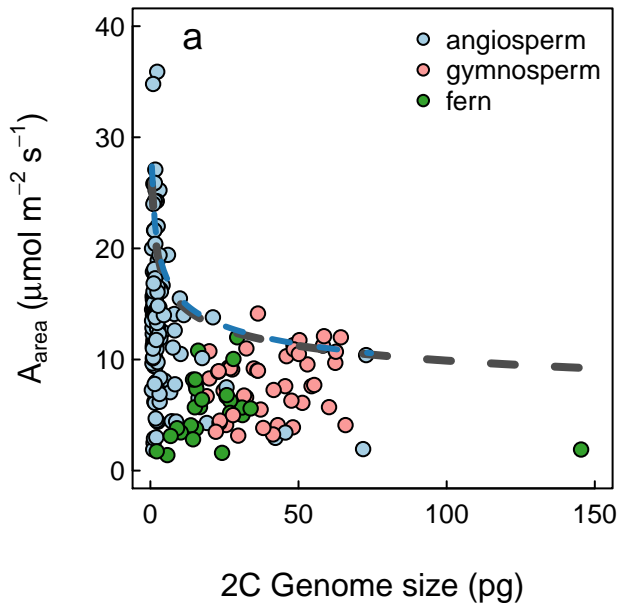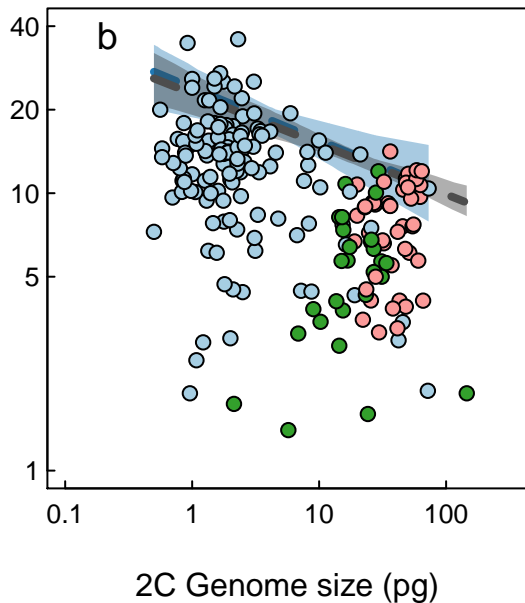



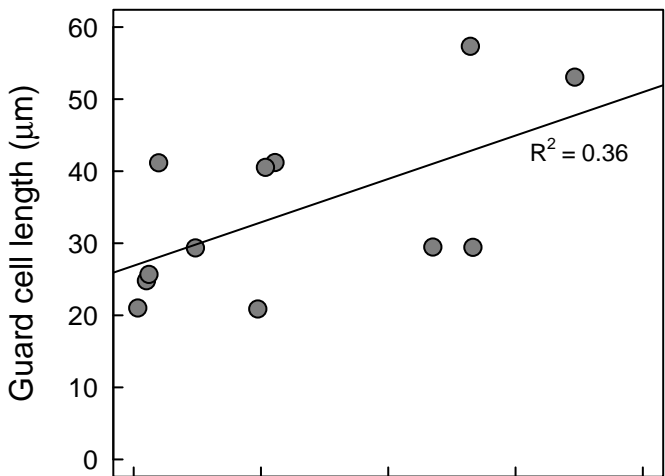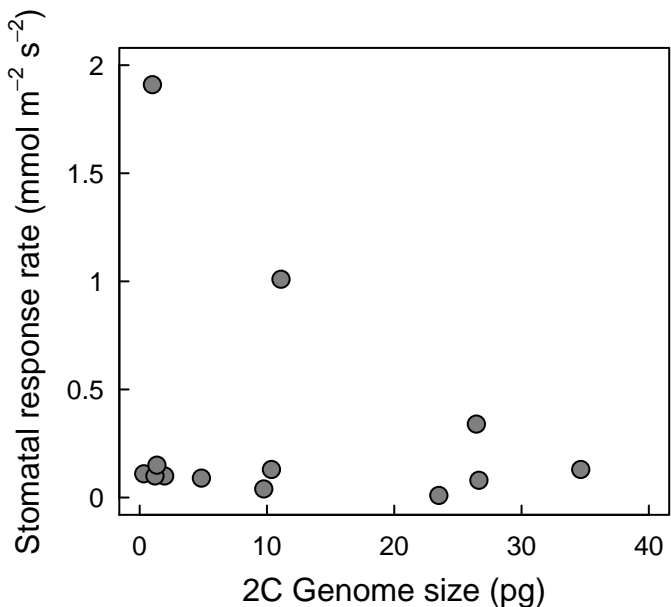

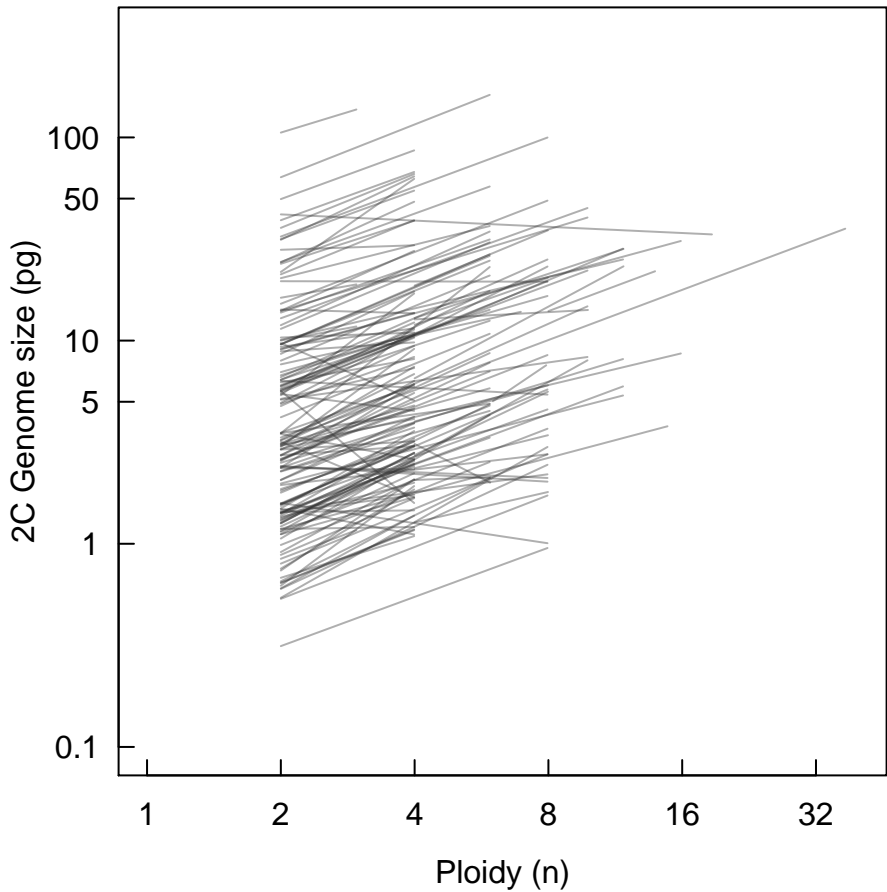

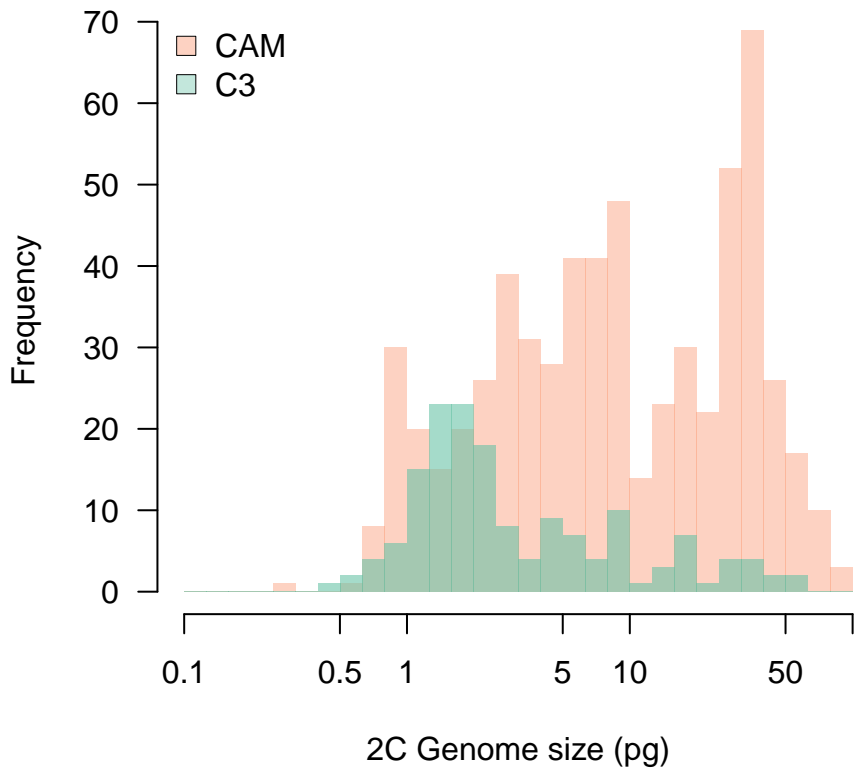

Source: http://biorxiv.org/content/10.1101/619585v2.full.pdf
